# Supplementary material for: A walk in the maze: variation in Late Jurassic tridactyl dinosaur tracks from the Swiss Jura Mountains (NW Switzerland)
Source: PubMed Central journal article supplement (PMC5885975; doi:10.7717/peerj.4579), 2018-04-02

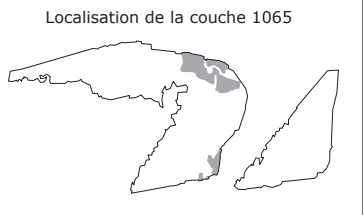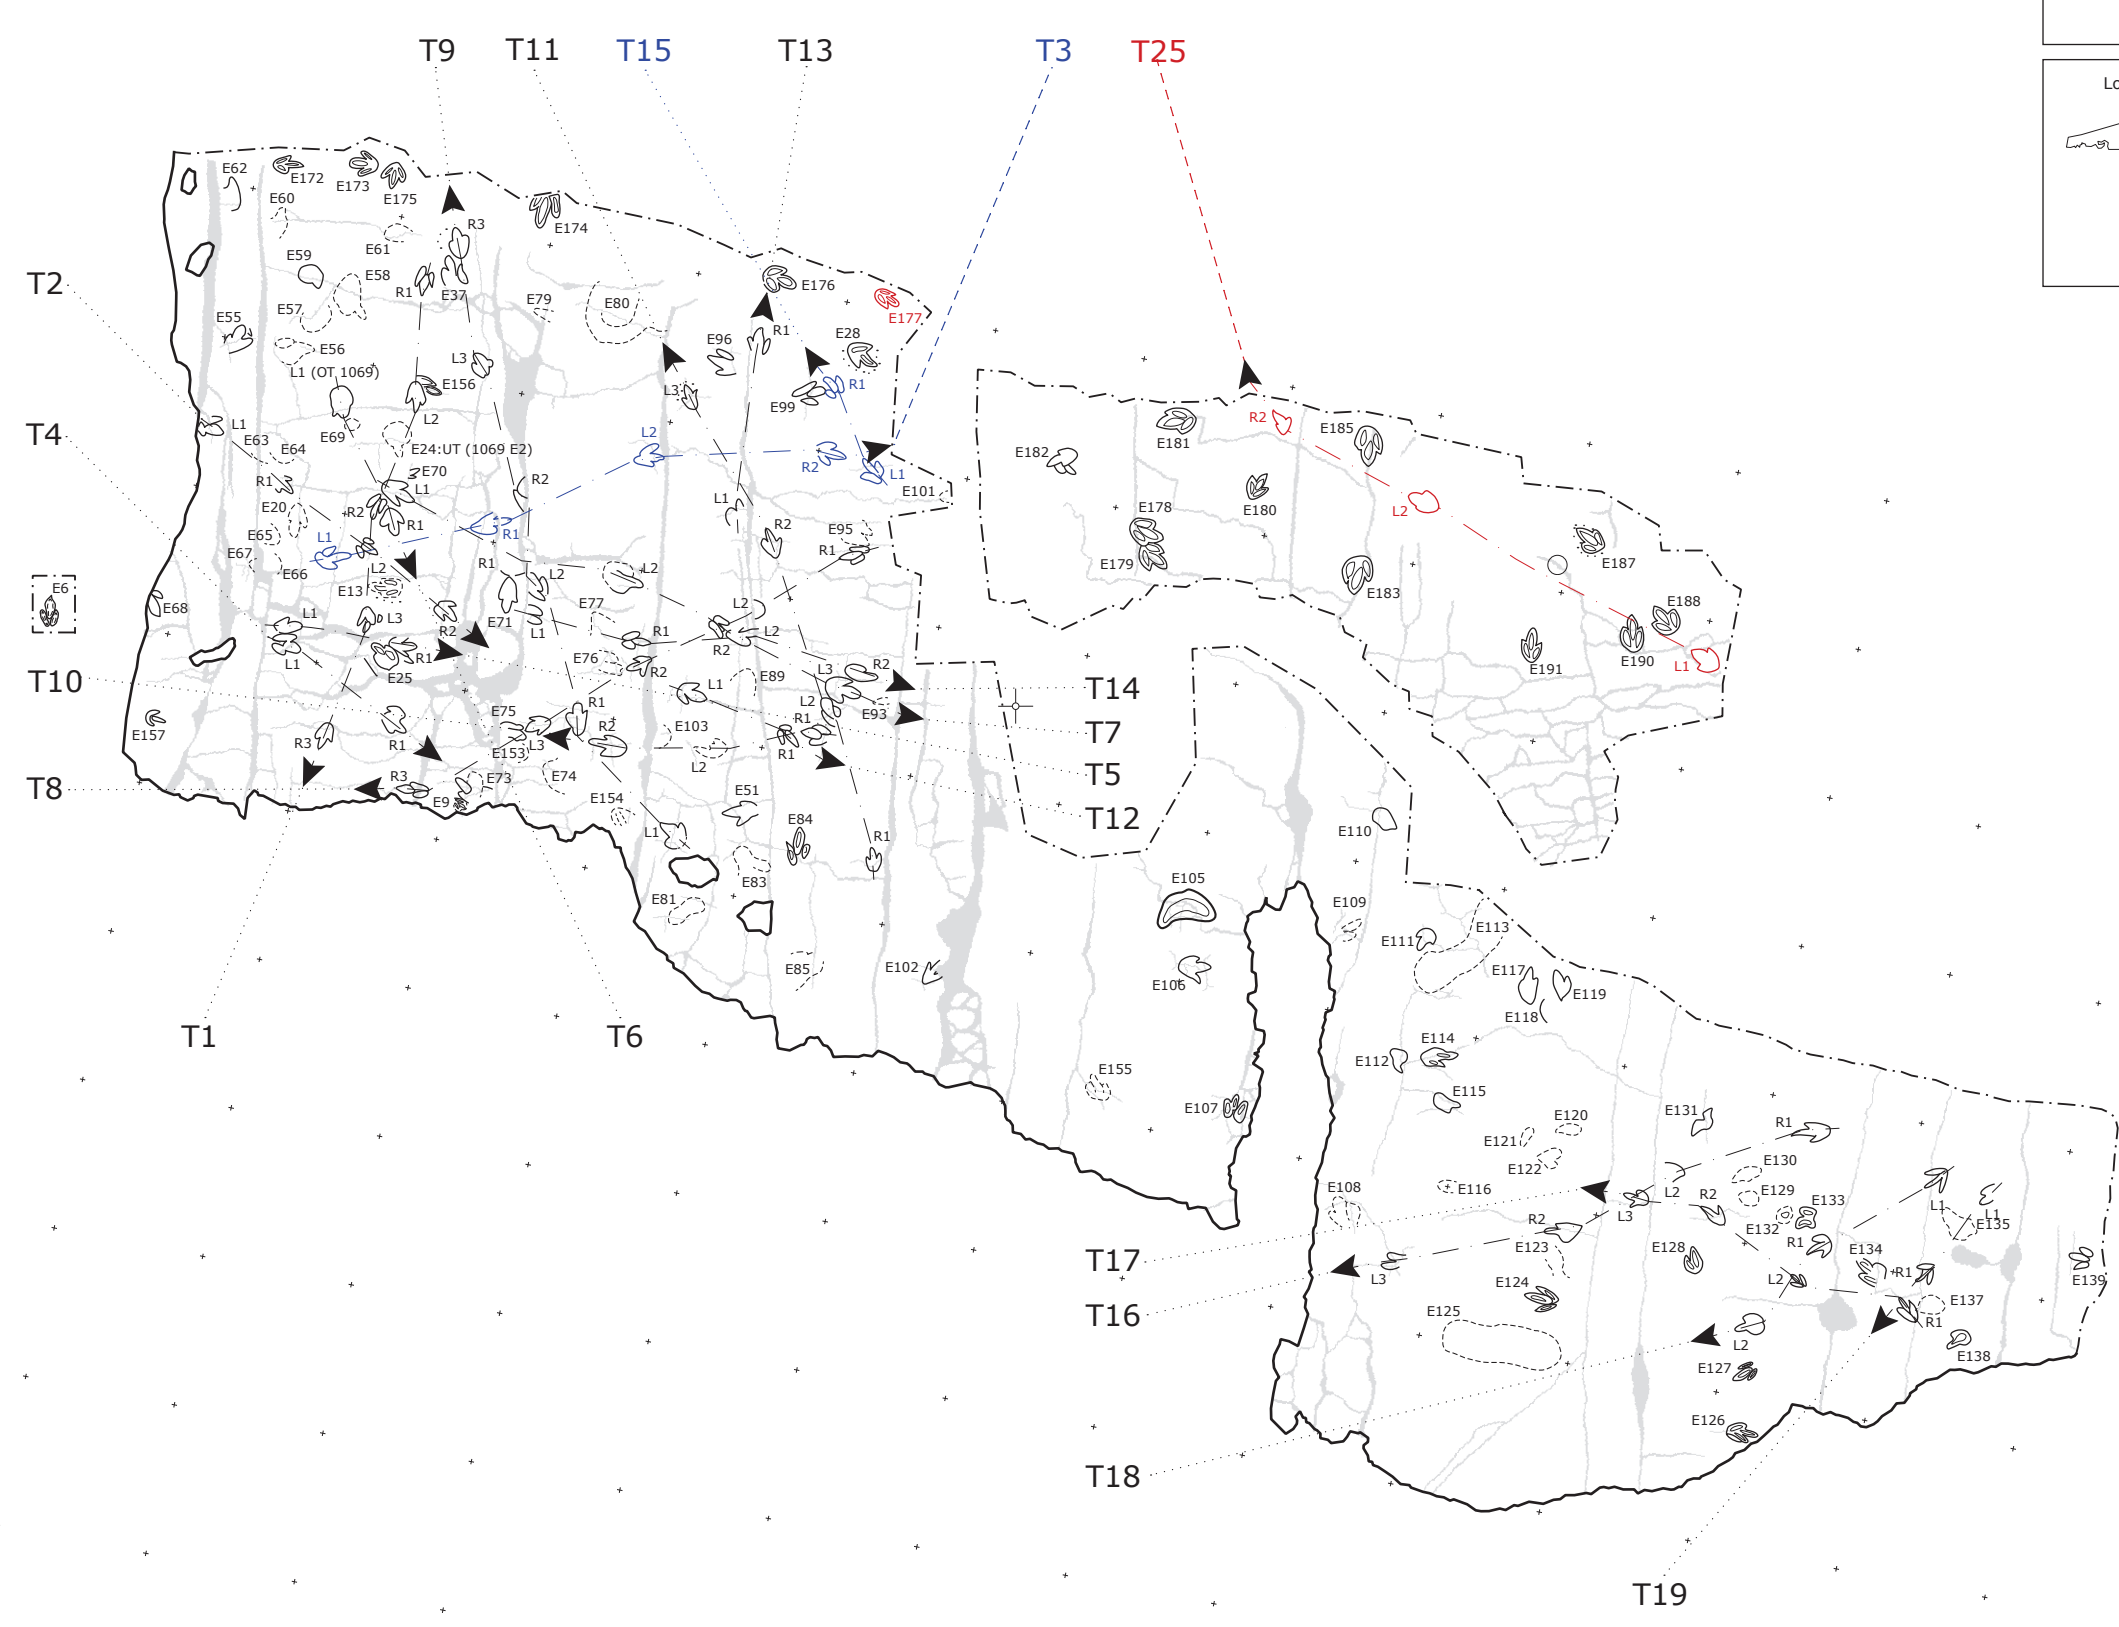

568610/250420

15/45  
 568610.088/250418.171  
 10.832°

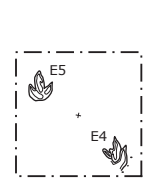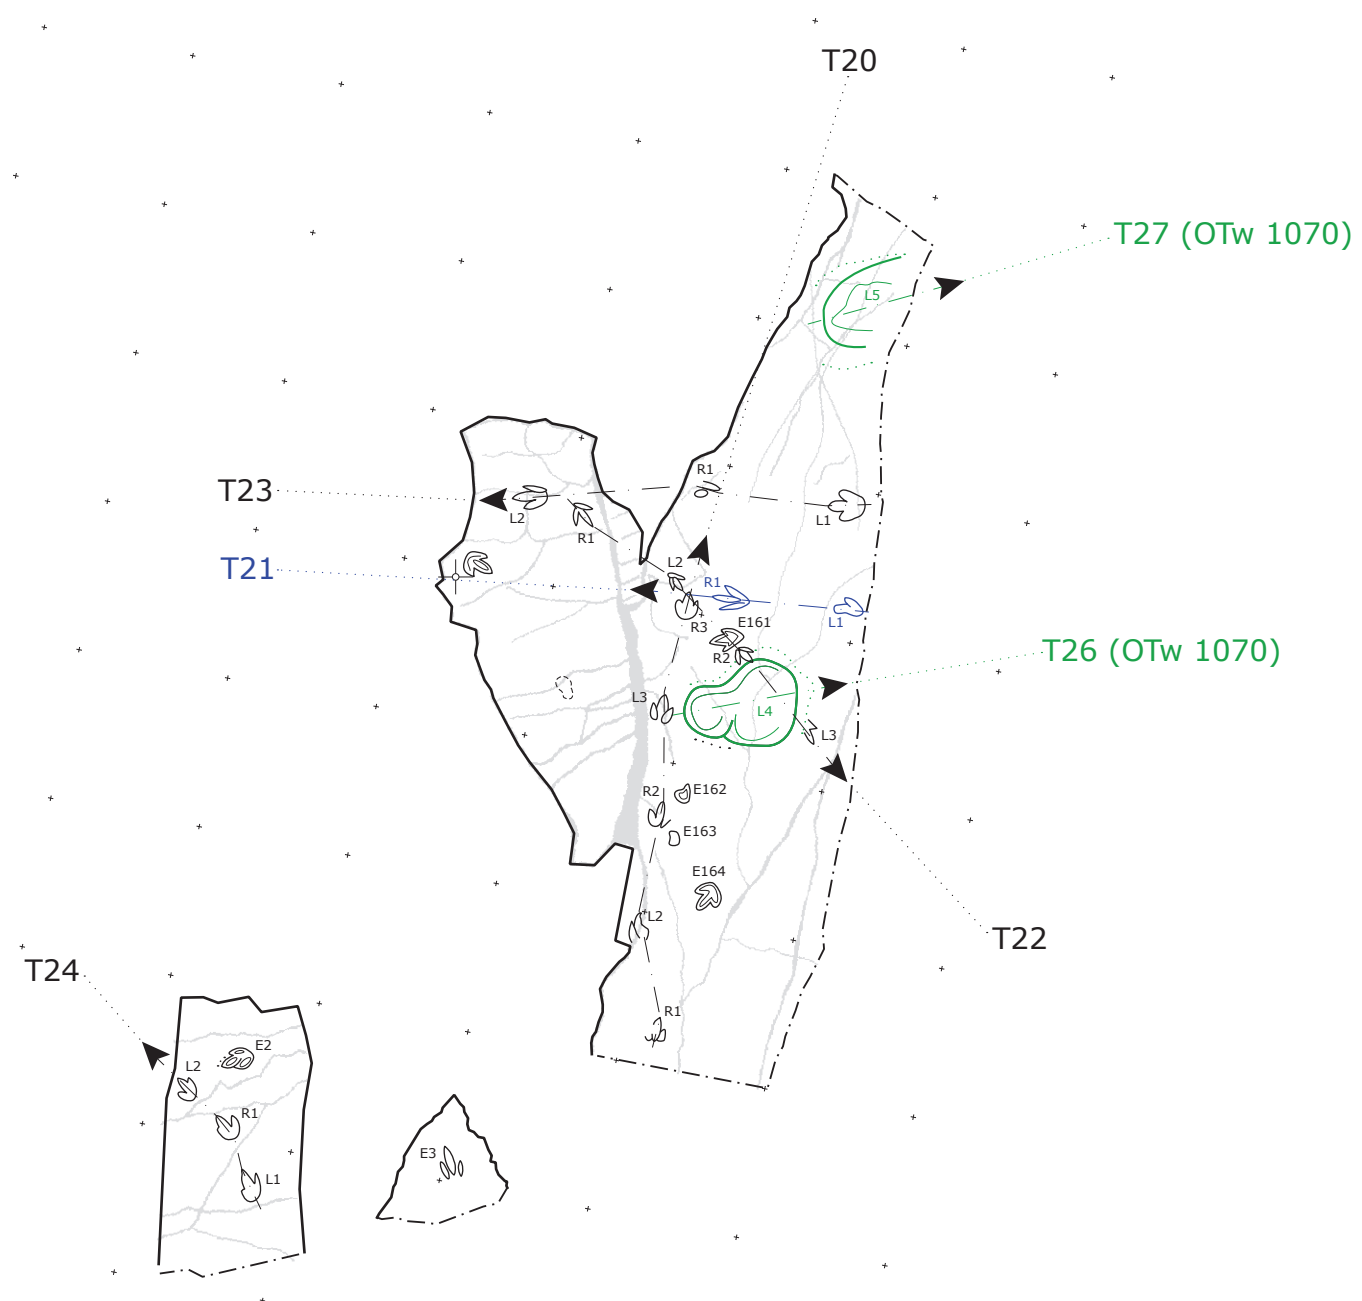

Supplement: peerj-06-4579-s003.pdf [file peerj-06-4579-s003.pdf]
